# Supplementary material for: The Burden of Urinary Tract Infections on Quality of Life and Healthcare in Patients with Interstitial Cystitis
Source: MDPI journal article supplement (doi:10.3390/healthcare11202761), 2023-10-18
Supplement: s1 [file s1]

## Diagnose en symptomen

### 1. Heeft u Interstitiële Cystitis ofwel het Blaaspijn Syndroom? (IC/BPS)

- ☐ Ja
- ☐ Nee, mijn partner of iemand die dicht bij mij staat heeft IC/BPS
- ☐ Anders, namelijk.....

Toelichting: indien u deze vragenlijst invult als naaste, kunt u bij alle volgende vragen 'u' lezen als 'uw naaste'.

### 2. Welke klachten heeft u van IC/BPS? Vink deze aan, en geef vervolgens aan welke klacht voor u als eerst aangepast zou moeten worden. U kunt uw klachten op volgorde zetten (1, 2, 3, 4).

- |                                                                                 | <i>volgorde</i>          |
|---------------------------------------------------------------------------------|--------------------------|
| <input type="checkbox"/> Pijn in de blaas en/of bekken                          | <input type="checkbox"/> |
| <input type="checkbox"/> Frequent plassen                                       | <input type="checkbox"/> |
| <input type="checkbox"/> Aandrang van plassen                                   | <input type="checkbox"/> |
| <input type="checkbox"/> Slecht slapen door vaak plassen 's nachts of door pijn | <input type="checkbox"/> |

### 3. Hoe lang geleden bent u (ongeveer) gediagnosticeerd met IC/BPS?

- ☐ 0 - 2 jaar geleden
- ☐ 3 - 5 jaar geleden
- ☐ 6 - 10 jaar geleden
- ☐ 11 - 20 jaar geleden
- ☐ Langer dan 20 jaar geleden
- ☐ Weet ik niet
- ☐ Niet van toepassing/ geen diagnose gesteld

### 4. Hoe lang had u al IC/BPS klachten vóór de diagnose gesteld werd?

- ☐ 0 - 6 maanden
- ☐ 7 - 12 maanden
- ☐ 1 - 2 jaar geleden
- ☐ 3 - 5 jaar geleden
- ☐ 6 - 10 jaar geleden
- ☐ 11 - 20 jaar geleden
- ☐ Langer dan 20 jaar geleden
- ☐ Weet ik niet
- ☐ Niet van toepassing/ geen diagnose gesteld

### 5. Is de diagnose IC/BPS door een uroloog gesteld met een cystoscopie onderzoek?

- ☐ Ja
- ☐ Nee doorgaan naar vraag 7

### 6. Beantwoord deze vraag alleen Indien u bij de vorige vraag 'ja' heeft geantwoord.

**Wat waren de bevindingen van het blaasslijmvlies tijdens het cystoscopie onderzoek?**

- ☐ Er zijn rode zweren gevonden (de laesies van Hunner)
- ☐ Er is een ontstoken blaaswand gevonden, maar geen rode zweren (laesies van Hunner)
- ☐ Er zijn geen afwijkingen gevonden van het blaasslijmvlies
- ☐ Weet ik niet

7. Mijn huisarts heeft nu of in het verleden mijn klachten van IC/BPS verward met een bacteriële blaasontsteking.

- ☐ Ja  
☐ Nee

doorgaan naar vraag 9

8. Beantwoord deze vraag alleen Indien u bij de vorige vraag 'ja' heeft geantwoord.  
In welke mate heeft deze verwarring door de huisarts een vertraging opgeleverd in het krijgen van de juiste diagnose van IC/BPS.

- ☐ Ongeveer 6 maanden  
☐ Ongeveer 1 jaar  
☐ Ongeveer 2 jaar  
☐ Ongeveer 3 jaar  
☐ Ongeveer ..... jaar (zelf invullen, geheel getal)

9. Heeft u naast uw IC/BPS ook regelmatig last van een bacteriële blaasontsteking?

- ☐ Ja  
☐ Nee  
☐ In het verleden was hier sprake van  
☐ Weet ik niet

10. Hoe vaak heeft u de afgelopen 2 jaar een antibiotica kuur gekregen voor een bacteriële blaasontsteking?

- ☐ Geen  
☐ 1 tot 3 keer  
☐ 4 tot 5 keer  
☐ 6 tot 10 keer  
☐ Meer dan 10 keer

11. Heeft u de afgelopen jaren een periode antibiotica als onderhoudsdosering gebruikt ter voorkoming van een bacteriële blaasontsteking?

- ☐ Ja  
☐ Nee

12. Is er bij u in een urinekeek ooit een bacterie gevonden die resistent was voor een antibiotica?

- ☐ Ja  
☐ Nee  
☐ Weet ik niet

13. Kunt u hieronder aangeven op de lijn van 0 - 10 in hoeverre bacteriële blaasontstekingen uw klachten van IC/BPS negatief beïnvloeden ( 0 = geen invloed, 10 is zeer veel invloed ).

Cijfer .....

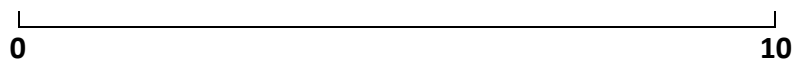

**14. Geef aan in hoeverre u het eens bent met de volgende stelling:**

**‘Ik ben bang voor het krijgen van een nieuwe bacteriële blaasontsteking’.**

- ☐ Mee eens
- ☐ Matig mee eens
- ☐ Onduidelijk
- ☐ Matig mee oneens
- ☐ Mee oneens

**15. Geef aan in hoeverre u het eens bent met de volgende stelling:**

**‘Na het doormaken van een bacteriële blaasontsteking krijg ik in de periode erna veel meer klachten van mijn IC/BPS.’**

- ☐ Mee eens
- ☐ Matig mee eens
- ☐ Onduidelijk
- ☐ Matig mee oneens
- ☐ Mee oneens

**16. Geef aan in hoeverre u het eens bent met de volgende stelling:**

**‘Door bacteriële blaasontstekingen moet ik veel vaker medische zorg zoeken voor mijn IC/BPS klachten.’**

- ☐ Mee eens
- ☐ Matig mee eens
- ☐ Onduidelijk
- ☐ Matig mee oneens
- ☐ Mee oneens

---

## Vragen over uzelf

Tot slot: Om de resultaten beter te kunnen analyseren stellen we u nog enkele vragen over uzelf. We zouden het op prijs stellen als u deze wilt beantwoorden. Bent u naaste van iemand met IC/BPS? Vul de laatste twee vragen dan in voor degene met IC/BPS.

**148. Wat is uw geslacht?**

- ☐ Man
- ☐ Vrouw
- ☐ Dat zeg ik liever niet
- ☐ Anders, namelijk .....

**149. In welke leeftijdscategorie valt u?**

- ☐ 0-18 jaar
- ☐ 19-40 jaar
- ☐ 41-60 jaar
- ☐ 61-80 jaar
- ☐ Ouder dan 80 jaar
